# Supplementary material for: The XPF-ERCC1 Complex Is Essential for Genome Stability and Is Involved in the Mechanism of Gene Targeting in Physcomitrella patens
Source: PubMed Central journal article supplement (PMC6521618; doi:10.3389/fpls.2019.00588), 2019-05-09
Supplement: Data_Sheet_1.pdf [file Data_Sheet_1.pdf]

**Table S1** Primers used in this study.

| Locus        | Primer name | orientation | Sequence 5'-3'         |
|--------------|-------------|-------------|------------------------|
| <i>XPF</i>   | PpXPF#1     | Forward     | CTGGACGACAATTCCGATTA   |
|              | PpXPF#2     | Reverse     | TTTCTCCTGGTCATCTTCTG   |
|              | PpXPF#12    | Reverse     | AGCGCTGACCCTGTCAACCTT  |
|              | PpXPF#13    | Forward     | AGGTCCTTTCATGCTAGAGTG  |
| <i>ERCC1</i> | PpERCC1#1   | Forward     | GTAGCACAGAAGGACAACAC   |
|              | PpERCC1#2   | Reverse     | GCTTGCCATGTCTGCTATTC   |
|              | PpERCC1#17  | Forward     | GATGTGATCAAACCGCTAC    |
|              | PpERCC1#18  | Reverse     | GCTTGCCATGTCTGCTATTC   |
| <i>APT</i>   | PpAPT#2     | Forward     | TTTTTGCGCTCGCTGTTTCTG  |
|              | PpAPT#14    | Forward     | AGATGTCGGCCTCCAAGGATG  |
|              | PpAPT#19    | Reverse     | CCCGACAACCTTCTCACGACCC |
|              | PpAPT#20    | Reverse     | TAAATAATTCTGACCCAAAGT  |
| HygR         | ProRev      | Reverse     | GTCTTGCGAAGGATAGTGGG   |
|              | TerFwd      | Forward     | CGCTGAAATCACCAGTCTCTCT |

**Table S2** Comparison of transformation and gene targeting efficiencies using an ends-out type targeting construct containing no heterologous selectable marker.

| Type of transforming DNA | Genotypes    | Regenerants <sup>a</sup> | 2FA <sup>R</sup> Plants <sup>b</sup> | Gene targeting frequency (%) <sup>c</sup> |
|--------------------------|--------------|--------------------------|--------------------------------------|-------------------------------------------|
| Ends-out                 | Wild type    | 359848                   | 2584                                 | 0.72 ± 0.13 <sup>d</sup>                  |
|                          | <i>xpf</i>   | 464812                   | 2026*                                | 0.43 ± 0.08                               |
| Homologous ends          | <i>ercc1</i> | 200385                   | 1042*                                | 0.52 ± 0.07                               |
|                          | Wild type    | 54667                    | 82                                   | 0.15 ± 0.03                               |
| Ends-out                 | <i>xpf</i>   | 62500                    | 75                                   | 0.12 ± 0.04                               |
|                          | <i>ercc1</i> | 56364                    | 62                                   | 0.11 ± 0.07                               |
| Heterologous ends        | Wild type    | 30682                    | 183                                  | 0.59 ± 0.03                               |
|                          | <i>xpf</i>   | 36667                    | 176**                                | 0.48 ± 0.03                               |
| Ends-in                  | <i>ercc1</i> | 49524                    | 208*                                 | 0.42 ± 0.04                               |
|                          | Wild type    | 72857                    | 102                                  | 0.14 ± 0.01 <sup>d</sup>                  |
| Ends-in                  | <i>xpf</i>   | 54286                    | 38*                                  | 0.07 ± 0.02                               |
|                          | <i>ercc1</i> | 87013                    | 87**                                 | 0.1 ± 0.02                                |
| Heterologous ends        |              |                          |                                      |                                           |

<sup>a</sup> Protoplasts were transformed with the different vectors (see Fig. 3 and Fig.4) and regenerants were selected on 2-fluoroadenine.

<sup>b</sup> 2-FA<sup>R</sup> clones are the clones that experienced a gene targeting event and thus survived after subculture on 2-FA medium. Differences between wild type and the mutants were compared using Fisher's exact test. \* Correspond to p value <0.01, \*\* Correspond to p value <0.05.

<sup>c</sup> GT frequency (in %) express the frequency of 2-FA resistant among the population of regenerants.

<sup>d</sup> Average and standard deviation were determined from at least 3 independent experiments.
